# Supplementary material for: Evaluation of muscle activity, bite force and salivary cortisol in children with bruxism before and after low level laser applied to acupoints: study protocol for a randomised controlled trial
Source: Springer Nature journal article supplement (doi:10.1186/s12906-017-1905-y), 2017-08-08

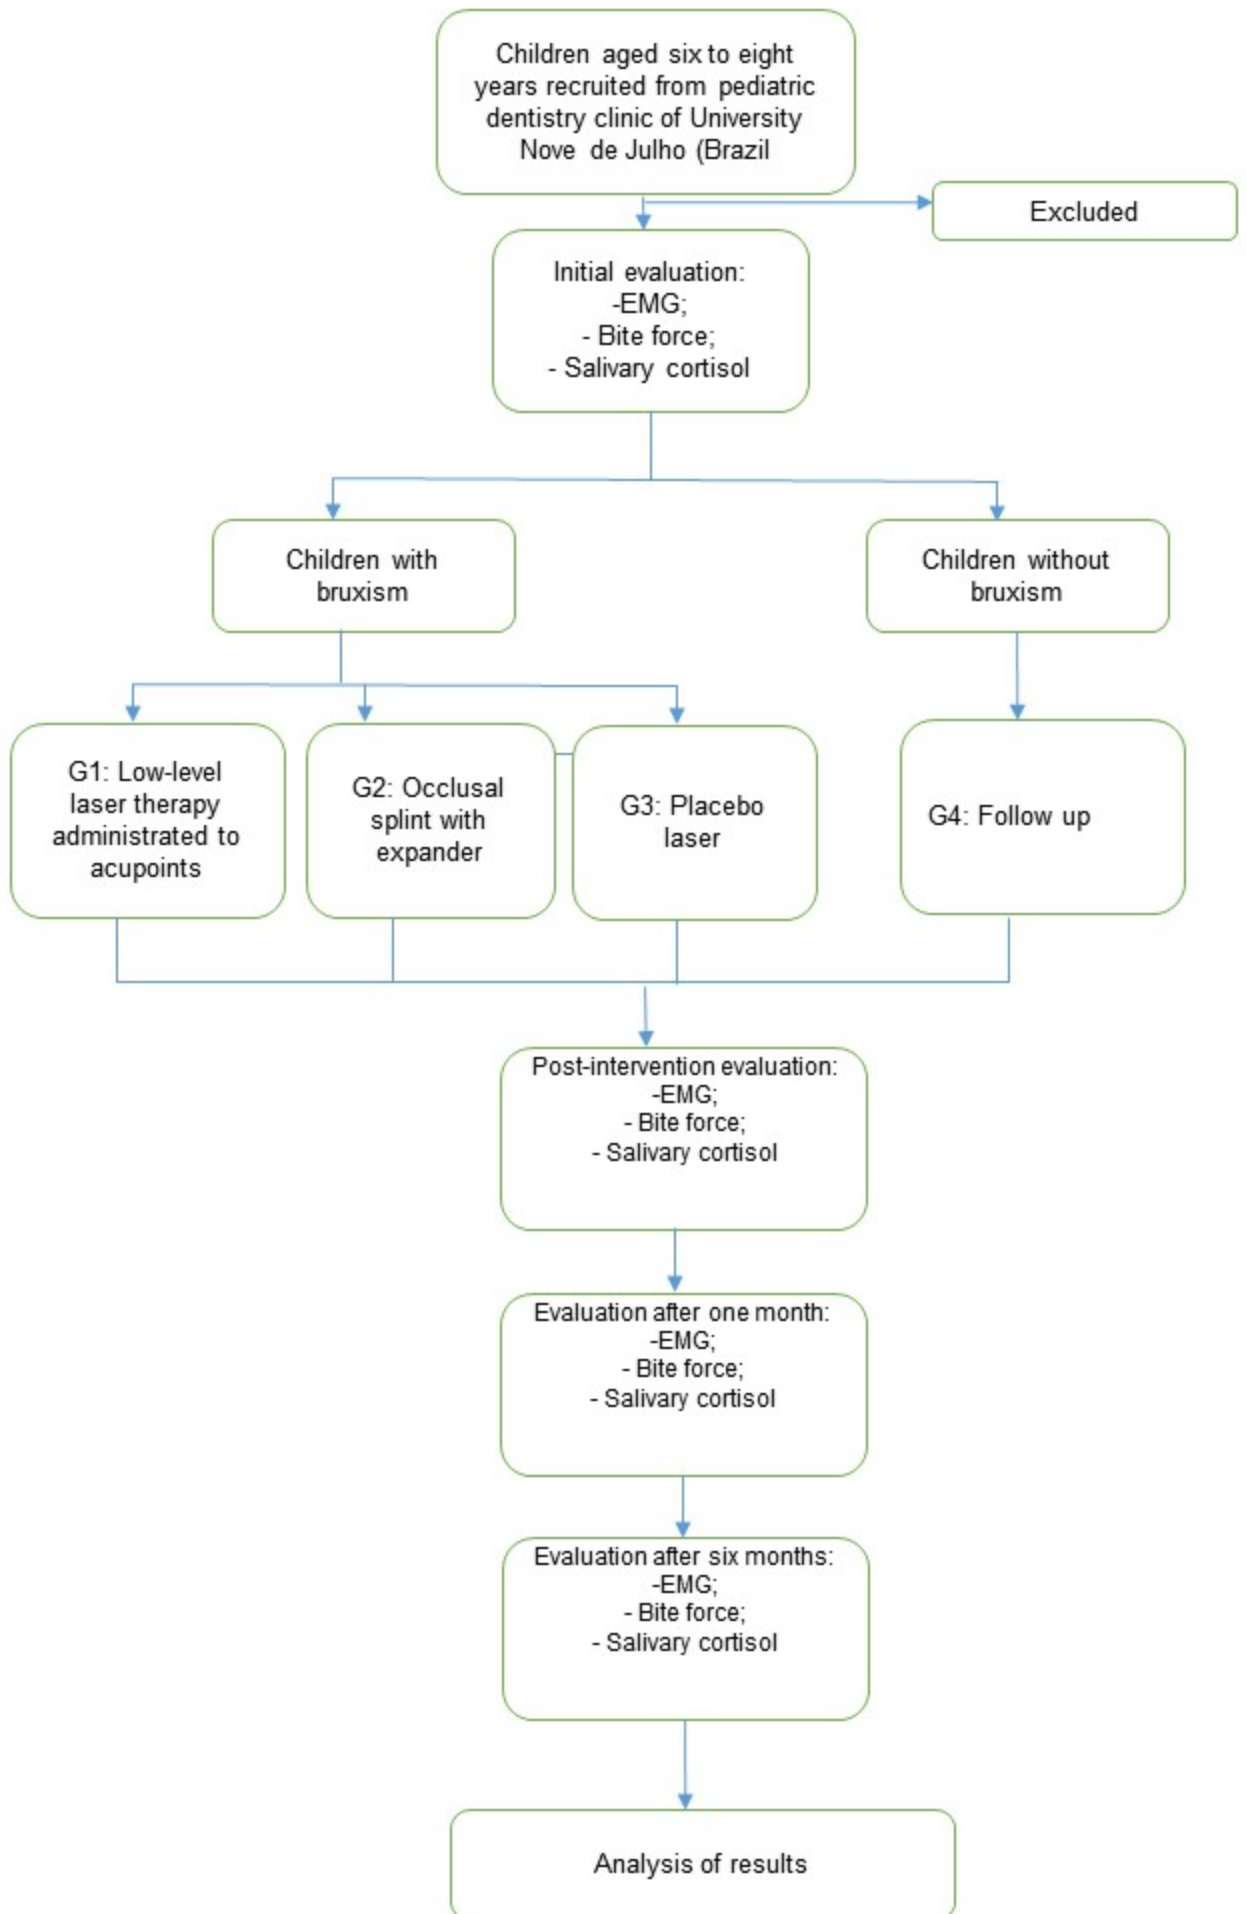

Supplement: MOESM1 [file 13445856]
